# Supplementary material for: Dynamic Rendering of the Heterogeneous Cell Response to Anticancer Treatments
Source: PLoS Comput Biol. 2013 Oct 17;9(10):e1003293. doi: 10.1371/journal.pcbi.1003293 (PMC3798276; doi:10.1371/journal.pcbi.1003293)
Supplement: Table S4 — Dose-dependence and variable coefficients in the final model. (DOC) [file pcbi.1003293.s013.doc]

**Dynamic rendering of the heterogeneous cell response to anticancer treatments**

F. Falcetta, M. Lupi, V. Colombo and P. Ubezio

Table S4. Dose-dependence and variable coefficients in the final model.

| **Module** | **Parameter** | **Function type** | **Dose-response coefficients** | |
| --- | --- | --- | --- | --- |
| **Variable** | **Fixed** |
| G1gen0 | pBL | Hill | *maxpBL, DmpBL* | *ϒpBL=2.5* |
| Rec | Hill | *maxRec, DmRec* | *ϒRec=-1* |
| DRBL | constant | *cost*DRBL | DthDRBL=1.5 |
| DR | constant | *cost*DR | DthDR=1.5 |
| SBrdU-gen0 | Del | constant | *costDel* | DthDel=7.5 |
| SBrdU+gen0 | Del | constant |  | *costDel=0.25*  DthDel=1.5 |
| G2 BrdU-gen0 | pBL | Hill | *DmpBL* | *maxpBL=1 ϒpBL=2.5* |
| Rec | Hill | *maxRec, DmRec* | *ϒRec=-2.5* |
| DRBL | constant | *cost*DRBL | DthDRBL=1.5 |
| G2 BrdU+gen0 | pBL | Hill | *DmpBL* | *maxpBL=1 ϒpBL=1.5* |
| Rec | Hill | *maxRec, DmRec* | *ϒRec=-1* |
| DRBL | constant | *cost*DRBL | DthDRBL=1.5 |
| G1gen1 | pBL* | Hill | *maxpBL,DmpBL* | *ϒpBL=2.5* |
| Rec* | Hill | *maxRec, DmRec* | *ϒRec=-2.5* |
| DRBL | Hill | *max*DRBL, *Dm*DRBL | *ϒDRBL=10* |
| Sgen1 | Del | Hill | *maxDel, DmDel* | *ϒDel=2.5* |
| G2gen1 | pBL* | Hill | *maxpBL,DmpBL* | *ϒpBL=2.5* |
| Rec | constant | *costRec* | *DthRec=7.5* |
| DRBL | constant | *cost*DRBL | DthDRBL=7.5 |
| G1gen2 | DRBL | Hill | *max*DRBL*, Dm*DRBL | *ϒDRBL=10* |
| G2gen2 | DRBL | constant | *cost*DRBL | DthDRBL=1.5 |
| pol | pPol | Hill | *maxpPol* | *Dm*pPol=8.5 *ϒ*pPol*=1* |
| DRpol | Hill | *max*DRpol | *Dm*DRPol=1.5 *ϒ*DRPol*=2.5* |

*The same parameter was used for gen1 and gen2.
