# Supplementary material for: Dynamic Rendering of the Heterogeneous Cell Response to Anticancer Treatments
Source: PLoS Comput Biol. 2013 Oct 17;9(10):e1003293. doi: 10.1371/journal.pcbi.1003293 (PMC3798276; doi:10.1371/journal.pcbi.1003293)
Supplement: Table S5 — Best fit values of variable parameters in the final model, with 95% confidence intervals. (DOC) [file pcbi.1003293.s014.doc]

**Dynamic rendering of the heterogeneous cell response to anticancer treatments**

F. Falcetta, M. Lupi, V. Colombo and P. Ubezio

Table S5. Best fit values of variable parameters in the final model, with 95% confidence intervals, evaluated either by the Monte Carlo or by the likelihood-based methods (see Uncertainty analysis section in text S4).

| **Module** | **Parameter** | **Function type** | **Variable** | **Best fit** | **M 95% CIa** | **L 95% CIb** |
| --- | --- | --- | --- | --- | --- | --- |
| G1gen0 | pBL | Hill | *maxpBL* | 0.68 | 0.62 - 0.73 | 0.64-0.72 |
| *DmpBL* | 0.8 | 0.6 - 0.9 | 0.6-1.0 |
| Rec | Hill | *maxRec* | 0.19 | 0.04 - 0.24 | 0.16-0.24 |
| *DmRec* | 0.5 | 0.5 - 4.1 | 0.4-0.6 |
| DRBL | constant | *cost*DRBL | 0.06 | 0.03 - 0.07 | 0.04-0.08 |
| DR | constant | *cost*DR | 0.01 | 0 - 0.02 | 0.01-0.02 |
| SBrdU-gen0 | Del | constant | *costDel* | 0.64 | 0.54 - 0.68 | 0.55-0.71 |
| G2BrdU-gen0 | pBL | Hill | *DmpBL* | 2.1 | 1.6 - 2.9 | 1.3-2.9 |
| Rec | Hill | *maxRec* | 0.40 | 0.27 - 0.60 | 0.29-0.62 |
| *DmRec* | 8.2 | 6.5 - 9.9 | 6.3-12.9 |
| DRBL | constant | *cost*DRBL | 0 | 0 - 0.011 | 0-0.006 |
| G2 BrdU+  gen0 | pBL | Hill | *DmpBL* | 1.2 | 0.9 - 1.6 | 1.0-1.5 |
| Rec | Hill | *maxRec* | 0.07 | 0.05 - 0.13 | 0.06-0.08 |
| *DmRec* | 10.0 | 2.8 – 10.0 | 7.7-13.8 |
| DRBL | constant | *cost*DRBL | 0 | 0 - 0.003 | 0-0.001 |
| G1gen1 | pBL* | Hill | *maxpBL* | 0.53 | 0.49 - 0.55 | 0.51-0.55 |
| *DmpBL* | 0.6 | 0.5 - 0.7 | 0.5-0.6 |
| Rec* | Hill | *maxRec* | 0.03 | 0.02 - 0.05 | 0.04-0.05 |
| *DmRec* | 1.3 | 0.9 - 1.7 | 1.1-1.5 |
| DRBL | Hill | *max*DRBL, | 0.015 | 0.013 - 0.017 | 0.014-0.018 |
| *Dm*DRBL | 2.3 | 2.0 - 2.5 | 2.2-2.5 |
| Sgen1 | Del | Hill | *maxDel,* | 0.54 | 0.49 - 0.57 | 0.52-0.57 |
| *DmDel* | 0.7 | 0.6 - 0.8 | 0.6-0.8 |
| G2gen1 | pBL* | Hill | *maxpBL,* | 0.81 | 0.76 - 0.87 | 0.73-0.90 |
| *DmpBL* | 2.5 | 2.2 - 2.8 | 2.2-2.8 |
| Rec | constant | *costRec* | 0.08 | 0.05 - 0.16 | 0.06-0.13 |
| DRBL | constant | *cost*DRBL | 0.07 | 0.03 - 0.19 | 0.04-0.18 |
| G1gen2 | DRBL | Hill | *max*DRBL*,* | 0.2 | 0.08 - 0.20 | 0.09-0.38 |
| *Dm*DRBL | 6.9 | 6.2 - 7.2 | 6.4-7.7 |
| G2gen2 | DRBL | constant | *cost*DRBL | 0.10 | 0.05 - 0.19 | 0.05-0.56 |
| pol | pPol | Hill | *maxpPol* | 0.84 | 0.78 - 0.90 | 0.79-0.90 |
| DRpol | Hill | *max*DRpol | 0.003 | 0.002 - 0.003 | 0.002 - 0.004 |

*The same parameter was used for gen1 and gen2.

a M 95% CI:95% confidence intervals, based on the Montecarlo method.

b L 95% CI: Likelihood-based 95% confidence intervals.
